## Of puzzles and pavements: a quantitative exploration of leaf epidermal cell shape

Róza V. Vőfély<sup>1‡</sup>, Joseph Gallagher<sup>2‡</sup>, Grace D. Pisano<sup>2</sup>, Madelaine Bartlett<sup>2\*</sup> and Siobhan A. Braybrook<sup>1,3\*</sup>

1 The Sainsbury Laboratory, University of Cambridge

2 Department of Biology, UMass Amherst

3 Molecular, Cell and Developmental Biology, UCLA

‡These authors contributed equally to this manuscript

\*co-corresponding authors: [siobhanb@ucla.edu](mailto:siobhanb@ucla.edu) and [mbartlett@cns.umass.edu](mailto:mbartlett@cns.umass.edu)

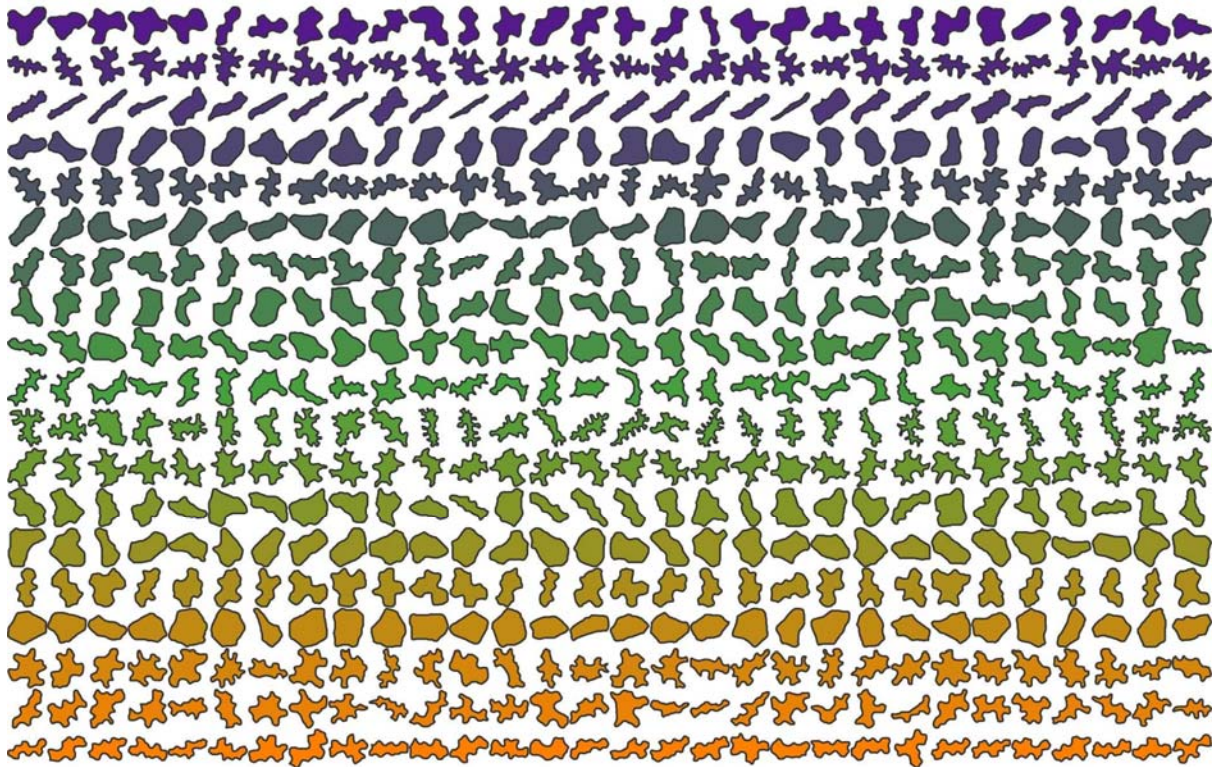

(Representative leaf epidermal cell shapes from our dataset of 278 species)

1 **Summary.** The epidermal cells of leaves lend themselves readily to observation and display  
2 many shapes and types: tabular pavement cells, complex trichomes, and stomatal  
3 complexes<sup>1</sup>. Pavement cells from *Zea mays* (maize) and *Arabidopsis thaliana* (arabidopsis)  
4 both have highly undulate anticlinal walls and are held as representative of monocots and  
5 eudicots, respectively. In these two model species, we have a nuanced understanding of the  
6 molecular mechanisms that generate undulating pavement cell shape<sup>2-9</sup>. This model-system  
7 dominance has led to two common assumptions: first, that particular plant lineages are  
8 characterized by particular pavement cell shapes; and second, that undulatory pavement cell  
9 shapes are common enough to be model shapes. To test these assumptions, we quantified  
10 pavement cell shape in the leaves of 278 vascular plant taxa and assessed cell shape metrics  
11 across large taxonomic groups. We settled on two metrics that described cell shape diversity  
12 well in this dataset: aspect ratio (degree of cell elongation) and solidity (a proxy for margin  
13 undulation). We found that pavement cells in the monocots tended to have weakly undulating  
14 margins, pavement cells in ferns had strongly undulating margins, and pavement cells in the  
15 eudicots showed no particular degree of undulation. Indeed, we found that cells with strongly  
16 undulating margins, like those of arabidopsis and maize, were in the minority in seed plants.  
17 At the organ level, we found a trend towards cells with more undulating margins on the abaxial  
18 leaf surface vs. the adaxial surface. We also detected a correlation between cell and leaf  
19 aspect ratio: highly elongated leaves tended to have highly elongated cells (low aspect ratio),  
20 but not in the eudicots. This indicates that while plant anatomy and plant morphology can be  
21 connected, superficially similar leaves can develop through very different underlying growth  
22 dynamics (cell expansion and division patterns). This work reveals the striking diversity of  
23 pavement cell shapes across vascular plants, and lays the quantitative groundwork for testing  
24 hypotheses about pavement cell form and function.

## 25 **Introduction**

26 The first cell was described by Robert Hooke in 1665; the empty cells of sectioned cork, seen  
27 under a microscope, were likened to the cells of a honeycomb<sup>10</sup>. Since that time, scientists  
28 have been observing plant cells in all of their diversity of form. The epidermal cells of leaves  
29 lend themselves readily to observation and display a great diversity of shapes and types:  
30 tabular pavement cells, complex trichomes, and stomatal complexes<sup>11</sup>. Pavement cell shape,  
31 in particular, has been the focus of many recent studies, probing the mechanistic basis of cell  
32 shape generation<sup>2-6,8,12-14</sup>.

33 Molecular studies of pavement cell shape generation have focused almost exclusively on  
34 model genetic species such as arabidopsis, maize, and *Oryza sativa* (rice)<sup>6,12,15</sup>. All of these  
35 epidermides present dramatically undulating cell margins, while maize and rice (both grasses)  
36 exhibit extreme cell elongation. From such studies a molecular framework for pavement cell  
37 shape generation has been proposed which explains extreme undulation as a result of  
38 differential cell wall properties underlain by differential cytoskeletal patterning<sup>13</sup>. Although  
39 intensely studied at a molecular level, and despite an early qualitative survey of leaf pavement  
40 cell shape<sup>16</sup>, it remains unclear how common margin undulation is in the plant kingdom.

41 Another abiding mystery is the biological reason (if any) for margin undulation – how does  
42 margin undulation affect organismal form and function? There are two long-standing  
43 hypotheses in the field: (1) undulations may increase cell-cell contact between adjacent cells,  
44 allowing for more efficient chemical signalling<sup>17</sup>; (2) undulating margins may increase  
45 epidermal integrity (think of a zipper)<sup>7</sup>; and (3) undulations may help leaves flex<sup>18</sup>. A third,  
46 more recent hypothesis proposes that larger, isotropic, cells undulate to alleviate the stress  
47 caused by their own growth dynamics<sup>19</sup>. This cell-strength hypothesis<sup>19</sup> was put forth on the  
48 basis of observations in species closely related to arabidopsis, and therefore represents a  
49 much-needed foray into non-model species. However, a phylogenetic context is an important  
50 consideration for any experimental designs of this type. Without taking phylogeny into account,  
51 one cannot be sure whether observed correlations are for functional reasons, or because of  
52 underlying relatedness of the species under study<sup>20</sup>. Quantitative assessments of cell shape,

53 coupled to modern phylogenetic methods, allow for this disentangling of contingency and  
54 functional relevance.

55 Here, we present a broad quantitative survey of epidermal pavement cell shape, analysed in  
56 an explicitly phylogenetic context. Utilising morphometric methods, we determined two useful  
57 metrics for describing margin undulation (solidity) and base cell shape (aspect ratio) across a  
58 wide swathe of the plant kingdom. We mapped solidity and aspect ratio values onto a  
59 phylogenetic tree of ferns and seed plants, and tested for phylogenetic signal. Phylogenetic  
60 signal assesses the propensity for trait values to be similar between closely related species.  
61 We found that while particular cell shape metrics characterized the ferns, gymnosperms, and  
62 monocots that we sampled, we could only detect phylogenetic signal at shallow phylogenetic  
63 levels in the eudicots. Our results indicate that cell shape is extremely diverse across the land  
64 plants, particularly in the eudicots, and that the mechanisms driving the development of plant  
65 cell shape should be explored in systems beyond the current dominant model systems.

## 66 **Materials and Methods**

### 67 **Sampling**

68 Fully expanded adult leaves were collected from healthy plants grown in one of two locations  
69 between September 2015 and December 2017: The Botanic Garden of the University of  
70 Cambridge or the UMass Amherst Natural History Collection (see Table S1 for full species  
71 list). Note that cultivars and wild taxa were analysed together in this study.

### 72 **Sample preparation**

73 Two methods of sample preparation were used; First, when possible, epidermal peels were  
74 removed from the adaxial side of the leaf. When this was not possible, the abaxial side was  
75 attempted. Secondly, when peels were unachievable a dissection and maceration protocol  
76 was followed. In detail, roughly 5x5 mm asymmetric trapezoids were cut from the leaves, near  
77 the midrib, halfway along the length. The asymmetric shape allows keeping track of adaxial  
78 and abaxial sides through the several-day-long process. These pieces were placed in multi-  
79 well plates and soaked in ~ 1 ml of a 1:7 mixture of acetic acid and 100% ethanol overnight at  
80 4°C, stirred at 50 rpm. The following day the solution was removed and samples were washed  
81 three times for 10 minutes. After the last wash, water was replaced by 1 ml of 1M NaOH  
82 solution and left to stand for 24 h at room temperature, without stirring. Following this, the  
83 samples were washed again as before, and the solution was replaced by 1 ml of a solution  
84 containing 250 g chloral hydrate dissolved in 100 ml of a 1:2 mixture of glycerol and water.  
85 The samples remained in this solution for 3-5 days, until they became fully transparent. When  
86 the clearing finished, the samples were washed again as before and stored in water. Note that  
87 gaps in joint adaxial/abaxial sampling resulted from temporal shifts in methods as well as  
88 technical challenges of peeling in some cases.

### 89 **Staining and Imaging**

90 Samples were stained with 0.1% toluidine blue in water overnight, mounted on glass slides  
91 and covered with a coverslip. Images were acquired at 100X, 200X, 400x, 700x or 1000x  
92 magnification (depending on what was found appropriate for a given sample) using a Keyence  
93 VHX-5000 digital microscope (Cambridge; Keyence UK & IL) or an Axioplan microscope  
94 (Amherst; Zeiss, DE). Whenever possible, images were taken from both sides of the sample,  
95 at the same magnification. Images were saved in .tif format.

### 96 **Segmentation**

97 Automatic segmentation of these images proved to be very difficult due to image defects on  
98 different length scales: dust grains, trichomes and hairs, uneven staining, varying light intensity  
99 across the image. Some of these can be eliminated by simpler image processing methods



100 (filtering, smoothing) but others cannot. Therefore, we chose to perform segmentation  
101 manually, using a freely available image editor (GIMP<sup>21</sup>) using a tablet PC and stylus, resulting  
102 in a black-and-white image of cells. The outlines of the cells were extracted in MATLAB<sup>22</sup> using  
103 basic built-in functions. For each species, 30 cells were segmented per side (when both  
104 available).

## 105 **Leaf shape**

106 Leaves were flattened and scanned in front of a white background at a resolution of 300 dpi.  
107 These images were first binarised using an automatically determined simple threshold and the  
108 outlines were then extracted using MATLAB. One leaf sample (or leaflet for compound leaves)  
109 per species was used, the same leaf from which cells were extracted.

## 110 **Shape processing and statistical analysis**

111 Cell outlines were used to calculate traditional morphometric descriptors (absolute area in  $\mu\text{m}^2$   
112 for cells and  $\text{mm}^2$  for leaves, aspect ratio, circularity and solidity) and to extract the elliptic  
113 Fourier composition. Calculations were done using the momocs<sup>23</sup> package in R. Aspect ratio  
114 was calculated by calculating the ratio of and outline's width to length (See Fig. 1;  
115 `coo_width/coo_length`). Circularity (`coo_circularitynorm`) was defined as: perimeter squared  
116 divided by area, normalised by  $4\pi$ . Solidity was calculated by dividing the area of a shape by  
117 the area of its convex hull (see Fig. 1; `coo_solidity`). For the Fourier analysis of cell shapes 20  
118 harmonics was utilized based on a cumulative harmonic sum  $>99.9\%$  and test fitting outlines  
119 with undulatory margins (Fig. S3). A normalized Elliptical Fourier Analysis was performed  
120 using momocs (`efourier_norm`, for area); normalization was included as randomly sampled  
121 species, when stacked, exhibited clean alignments without rotational artefacts.

122 Principal component analysis was performed on the full dataset, again utilising the momocs  
123 package. Data from all cells were used in PC analysis presented here, not means or  
124 representative cells. For cells, PCA was conducted using all cells from all species. For leaf  
125 shape, the outline from one leaf (or leaflet for compound leaves) per species was used to  
126 calculate traditional morphometric descriptors as above. Correlations between traditional  
127 metrics (Spearman's rho) were examined in R.

## 128 **Tests for phylogenetic signal**

129 The data matrix for phylogenetic analysis was constructed by extracting sequences from the  
130 matrix used for inferring a recent megaphylogeny of vascular plants<sup>24</sup>. Where there was not  
131 an exact match for the species we sampled, we selected another species in the same genus  
132 from the megaphylogeny matrix. When there was no genus match, we retrieved sequences  
133 for each of the missing species from Genbank. The megaphylogeny matrix includes 7 gene  
134 regions. We aligned each of these gene regions individually using MAFFT, as implemented in  
135 Geneious, and concatenated each of these regions into a single matrix. A constraint tree,  
136 including all taxa in our analysis, was extracted from a megaphylogeny of vascular plants  
137 using phylomatic<sup>25,26</sup>. We used a constraint tree because we were not trying to infer  
138 phylogenetic relationships, but instead to generate a tree (with branch lengths) that we could  
139 use in downstream analyses. Model and partitioning scheme selection was performed using  
140 PartitionFinder. We analyzed our data matrix under the maximum likelihood information  
141 criterion using RAXML, as implemented on the CIPRES webserver<sup>27,28</sup>.

142 The resulting phylogeny was used in tests for phylogenetic signal using the R package  
143 PhyloSignal<sup>29</sup>. Phylogenetic signal is the tendency of traits in related species to resemble each  
144 other more than in species drawn at random from the same tree. In a test for phylogenetic  
145 signal, the null hypothesis is that the values of a particular trait are distributed independently  
146 from their phylogenetic distance in a tree. There are a number of tests for phylogenetic signal;

147 we selected local Moran's I which is designed to detect local hotspots of positive and negative  
148 trait autocorrelation<sup>29,30</sup>. The phylogeny figure was generated using the R package ggtree<sup>31</sup>,  
149 with final editing performed in Illustrator (Adobe).

150 **Data Availability.** The datasets generated during the current study, including the phylogenetic  
151 datamatrix and trees, have been deposited to dryad (dryad link to follow). Mean shape metrics  
152 are included in Supplemental Table 1. For some species, scanning electron micrographs are  
153 also available upon request, although not included in this study. Code for analyses and figure  
154 generation is available at XXXXX (Bartlett lab's github).

## 155 **Results and Discussion**

### 156 **Most vascular plants have slightly elliptical pavement cells with weakly undulating** 157 **margins.**

158 To survey pavement cell shape across vascular plants, we sampled leaf epidermides from  
159 278 vascular plant species, taking current phylogenetic hypotheses into account<sup>32,33</sup>. To  
160 quantify cell shape, we used the traditional shape descriptors of area, circularity, aspect ratio,  
161 and solidity (Fig. 1; See Methods for definitions). We utilised these traditional metrics because  
162 we found that elliptical Fourier analysis did not perform well with our extremely diverse dataset  
163 (Fig. S1); elliptical Fourier analysis did a reasonable job of capturing aspect ratio variance but  
164 not margin undulations (Fig. S1). In a principal components analysis (PCA) with the traditional  
165 metrics, the sum of PC1 and PC2 together accounted for 69.7% of shape variance (Fig. 1a,  
166 monocots and eudicots as an example; Fig. S1, all clades). The vectors describing the  
167 traditional morphospace indicated that aspect ratio and solidity were strong perpendicular  
168 separators of cell shape (Fig. 1a, inset). Solidity was calculated by finding the area of the cell  
169 shape and dividing it by the area of the convex hull (Fig. 1b); the convex hull of an object can  
170 be conceived of as a rubber band stretched around the perimeter, so that in undulating cells  
171 the convex hull gaps away from the true perimeter (Fig. 1b). To calculate aspect ratio, cells  
172 were oriented according to their longest axis and the longest cell width was divided by the  
173 longest cell length in this orientation (Fig. 1c). Circularity represents how deviant a cell shape  
174 is from a perfect circle<sup>7,34</sup> and captures both margin undulations and aspect ratios deviating  
175 from 1. This merged property was illustrated by the morphospace vector for circularity which  
176 was the inverse sum of that for aspect ratio and solidity (Fig. 1a, inset). Thus, we concluded  
177 that solidity and aspect ratio were good descriptors of margin undulation and base cell shape,  
178 respectively.

179 To determine whether pavement cells across vascular plants were characterized by a  
180 particular base cell shape or undulation pattern, we examined solidity and aspect ratio across  
181 our sampling. We found that most plant species displayed weak margin undulation. Solidity  
182 values for all species sampled occupied a range between 0.38 and 1, with a median of 0.802  
183 (Fig. 1d; Table S1). This skew indicated that while most sampled pavement cells showed some  
184 degree of undulation, a minority of species sampled displayed complex margins (low solidity).  
185 Both arabidopsis and maize pavement cells fell within the bottom 8% of solidity values for  
186 seed plants ( $S_{At} = 0.67$ ,  $S_{Zm} = 0.63$ ). The solidity metric is imperfect: curved cells with simple  
187 margins will also have a lower solidity value due to the calculation of convex hull area (Fig.  
188 1b). In addition, solidity describes the deviation of the perimeter from the convex hull, but it  
189 doesn't provide information on the pattern of that deviation. For example, a margin might have  
190 a few deep lobes or many shallow lobes but have similar solidity values. This may have also  
191 been an advantage in our analysis: when the pattern of lobing was variable within a species  
192 (e.g. Arabidopsis) solidity would have been less sensitive to small variances in lobe number;  
193 note that in a single species context, a new modification of Fourier analysis would prove an  
194 excellent tool to assess such variation<sup>35</sup>. Our analyses of cell aspect ratio indicated that while  
195 most pavement cells were mildly elliptical in their base cell shape (median > 0.5); highly  
196 anisotropic or truly isotropic cells were rare in our data set (Fig. 1e). The distribution of aspect  
197 ratio across all species sampled occupied a range of 0.069 to 0.805 with a median value of

198 0.643 (Fig. 1e; Table S1). Thus, we found that the average epidermal cell in plants might best  
199 be represented by a slightly anisotropic cell with weak margin undulation.

200 Highly undulate pavement cells are not common (Fig. 1d) and as such our molecular models  
201 of shape generation require modulation to reflect the diversity observed in the plant kingdom.  
202 The current molecular model for undulation (or protrusion) formation in arabidopsis has actin  
203 concentration at positions of protrusion outgrowth and microtubule bundling restricting growth  
204 across indentations. This role of actin in protrusion outgrowth is consistent in maize and  
205 rice<sup>6,15</sup>. Patterns of actin and microtubules in several other species with undulating cell wall  
206 margins are also consistent with this model, although microtubules likely have numerous roles  
207 in pavement cells<sup>4,12</sup>. Given the distant relationship between arabidopsis, a core eudicot, and  
208 maize and rice, core monocots, this mechanism may be common to all monocots and  
209 eudicots. In arabidopsis, the patterning of alternating actin/microtubule patches is set up by  
210 active RHO-RELATED PROTEIN FROM PLANTS 2 (ROP2). Active ROP2 promotes RIC4-  
211 mediated fine actin accumulation while suppressing RIC1-mediated microtubule bundling<sup>3</sup>. In  
212 a situation where protrusion number and depth vary quantitatively on a phenotypic continuum  
213 (Fig. 1e), it is possible that the alternating pattern of actin and microtubules (and their  
214 controlling RICs) may be distinct between different species. It is equally probable that the  
215 patterning is conserved but the wall components and modifiers differ, leading to different wall  
216 mechanics and growth.

217 Differential cytoskeletal patterning also likely leads to differential wall thickness and material  
218 composition, as recently shown in several species with undulating pavement cell margins<sup>18</sup>.  
219 Differential biochemistry and mechanics of the wall are likely contributors to cell shape  
220 formation in arabidopsis<sup>36</sup>. These differential material properties must also be considered  
221 when considering the 'reason' for undulation: the mechanical integrity of tissues during  
222 stretching may be important<sup>18</sup>. It has recently been proposed by modelling cell stresses that  
223 undulation helps an individual cell deal with its geometrically imposed stress as it gets  
224 isotropically larger<sup>19</sup>. A small sampling of plant species (n=16) showed a positive correlation  
225 between cell area and cell 'lobeyness'<sup>19</sup> ('lobeyness' was solidity calculated as a perimeter  
226 ratio, as opposed to area ratio here). In line with this hypothesis, pavement cell margin  
227 undulation is used in reconstructing paleoclimates because larger shade leaves often have  
228 larger pavement cells with more undulate margins<sup>37,38</sup>. Thus, we tested for this in our dataset,  
229 but found no correlation between mean cell area and mean solidity (Fig. S2). Differential wall  
230 mechanics might explain this lack of correlation in our broad sample: there may be multiple  
231 ways to be strong. For example, making the cell walls thicker or materially more rigid in a  
232 larger cell could also compensate for geometrically-imposed stress. An analysis of wall  
233 composition, thickness, and mechanics in large cells with varying degrees of undulation would  
234 prove interesting.

### 235 **Patterns and diversity in pavement cell shape by vascular plant clade**

236 To examine if trends in base cell shape and margin undulation might exist across the major  
237 clades of vascular plants with true leaves (megaphylls<sup>39</sup>), we examined the distributions of  
238 aspect ratio and solidity in the following clades: ferns, gymnosperms, the ANA grade,  
239 magnoliids, monocots, and eudicots<sup>32,40</sup>. We found that the ferns displayed a shift towards  
240 more undulate cells on average (Fig. 2a). Fern pavement cell margins have been described  
241 as more undulating than in the eudicots<sup>41</sup>, an observation that holds generally true in our data  
242 set; however, ferns exhibited the widest range of solidity values (0.38 to 0.98; Fig. 2a). The  
243 distribution of solidity values within the eudicots was also broad, although slightly less so than  
244 in ferns (Fig. 2a). Monocot and gymnosperm pavement cells tended to exhibit higher solidity  
245 values (less undulating margins) consistent with the qualitative literature for monocots<sup>16,41-  
246 45</sup>(Fig. 2a). With respect to aspect ratio, the ferns, early diverging angiosperms, and eudicots  
247 displayed normal distributions centering between 0.6 and 0.7, representing the slightly  
248 ellipsoidal base shape norm (Fig. 2b). In gymnosperms and monocots, the distributions were  
249 more skewed with medians below 0.4 indicating a trend toward a more anisotropic base shape

250 in these groups (Fig. 2b). Taken together, these results indicate that pavement cells in the  
251 ferns, monocots, and gymnosperms share specific aspect ratio and solidity traits, while  
252 pavement cell shape has diversified in the eudicots.

253 Our initial analysis did not take phylogeny into account, and cannot detect signal in specific  
254 orders or families obscured by considering, for example, 'eudicots' as a single group. To  
255 account for phylogenetic relationships, we mapped cell solidity and cell aspect ratio values  
256 onto a phylogeny of all the species that we sampled and tested for phylogenetic signal.  
257 Although related species tend to resemble one another, this is not true for every trait in every  
258 lineage. Tests for phylogenetic signal assess whether particular traits are more similar  
259 between closely related species than between distantly related species, or between species  
260 drawn at random from the same phylogenetic tree<sup>30,46</sup>. Most of the ferns we sampled (n=31/35,  
261 89%) showed evidence for phylogenetic signal for solidity, with more complex cell margins  
262 (low solidity, Fig. 3a). In contrast, most core monocots (n=38/46, 82%) have cells with less  
263 complex margins, falling within the first two quartiles of solidity (values closer to 1; Fig. 3b).  
264 Similarly, many core monocots had a strong signal for highly anisotropic cells (low aspect  
265 ratio, n=23/35, 66%). This was especially pronounced in the grasses, where we found  
266 evidence for phylogenetic signal for cell aspect ratio in 7 out of 8 (88%) sampled grasses (Fig.  
267 3c). The gymnosperms also exhibited phylogenetic signal for aspect ratio (Fig. 3d). In the  
268 eudicots, evidence for phylogenetic signal in both traits was concentrated in closely related  
269 species. There was no strong evidence for particular shape metrics characterizing families,  
270 orders, or other major eudicot clades. Thus, while eudicot epidermal cell shapes were not  
271 distinguished by particular shape metrics, fern epidermal cells are characterized by high  
272 undulation, core monocot epidermal cells by low undulation and low aspect ratio, and  
273 gymnosperm cells by low aspect ratio.

274 This result suggests that in the ferns and in the core monocots, aspects of either the cell  
275 margin patterning machinery (e.g. actin and microtubule dynamics), or wall material  
276 properties, are shared between members of each clade. In the eudicots, these cell shape  
277 generating mechanisms and cell wall properties may be more variable at large evolutionary  
278 distances. However, trait values between closely related species (e.g. species in the same  
279 genus) were often correlated, even in the eudicots (Fig. 3). Indeed, epidermal cell traits can  
280 be used as characters in systematics studies<sup>47-49</sup>. This highlights the critical importance of  
281 accounting for phylogeny when testing hypotheses about the function of particular epidermal  
282 cell shapes<sup>20</sup>. For example, particular epidermal cell shapes have been proposed to be  
283 important in drought tolerance, in focusing light onto the photosynthetic machinery, or in  
284 providing mechanical stability to the epidermis<sup>50-52</sup>. When these hypotheses are tested using  
285 multiple different species, it is important to remember that cell shapes may be similar between  
286 species not because of a particular function, but because of underlying phylogeny.

## 287 **Abaxial leaf surfaces present more undulate cells.**

288 Sparse qualitative observations indicated that abaxial cells tended to have more undulate  
289 margins than adaxial cells<sup>43</sup>. To test this across our sampling, we calculated the difference  
290 between the average adaxial solidity and the average abaxial solidity in the 146 species for  
291 which we had data from both sides of the leaf (81 eudicots, 30 monocots, 28 ferns; see  
292 Methods). We found that when a difference in cell solidity was present, the abaxial cells tended  
293 to have more undulations (lower solidity, Fig. 2a), in line with the qualitative literature<sup>16,53</sup>. The  
294 causes of such differences are ripe for discovery. In many cases, different sides of the leaves  
295 experience different microclimates; undulation exhibits some environmental plasticity and thus  
296 it is plausible that more undulation on abaxial surfaces could relate to local environmental  
297 influences<sup>43,54-56</sup>. In addition, abaxial vs. adaxial developmental identity may contribute to  
298 differential undulation<sup>43,57,58</sup>. The number of cells of other cell types on the abaxial surface,  
299 particularly increased stomatal number<sup>59</sup>, could contribute to increased undulation through a  
300 packing adjustment. Lastly, it is possible that differential growth rates between the two sides  
301 may relate to differential undulation; however, such growth differences would need to be



302 balanced to finally yield a flat leaf. In *curl* tomato mutants, whose curled leaves exhibit larger  
303 cells on the abaxial epidermis, there are no qualitative differences in abaxial (or adaxial) cell  
304 undulations from the wild type<sup>60</sup>.

### 305 **Anisotropic leaves tend to have anisotropic cells**

306 We next wanted to explore connections between leaf shape and cell shape. Final epidermal  
307 cell shape over the surface of a leaf is a record of the developmental history of growth patterns  
308 – highly anisotropic cells indicate directional cell expansion, while regions of smaller cells  
309 indicate cell expansion coupled with division<sup>61,62</sup>. Leaf form is likely generated by complex  
310 growth patterns that we would be unable to detect with our sampling<sup>63</sup>. However, in the  
311 Brassicaceae, a connection between growth direction, cell shape, and organ shape has  
312 recently been proposed<sup>19</sup>. In addition, in the flowers of *Saltugilia* spp.<sup>64,65</sup> and *Mimulus lewisii*<sup>66</sup>,  
313 highly anisotropic epidermal cells are present on anisotropic floral tubes, and more isotropic  
314 cells on petal lobes. We wondered whether we would be able to detect a similar connection  
315 between cell aspect ratio and leaf aspect ratio at the broad scale of our dataset.

316 To explore any connection between leaf and cell aspect ratio in our sampling, we examined  
317 correlations between leaf aspect ratio and cell aspect ratio. We found evidence for a  
318 correlation between leaf and cell aspect ratio: highly anisotropic leaves tended to have highly  
319 anisotropic cells, but not in the eudicots (Fig. 4a). This indicates that in the anisotropic leaves  
320 of some vascular plants, anisotropic growth likely involves cell expansion, with very little  
321 coincident cell division, across large regions of the growing leaf. Were the cells to divide as  
322 they expanded, this connection would have been lost. In contrast, even in eudicots with leaves  
323 in the lowest aspect ratio quartile, cell aspect ratio levels never reached the lowest quartile.  
324 For example, in *Plantago afra* (eudicot) and *Hemerocallis fulva* (monocot), leaf aspect ratio  
325 values were similar (0.091 and 0.087, respectively. Both class 4), but mean cell aspect ratio  
326 values were not (mean  $AR_{Pa}$  = 0.67, class 3; mean  $AR_{Hf}$  = 0.17, class 1). In the sampled  
327 eudicots as a whole, we found no correlation between cell aspect ratio and leaf aspect ratio.  
328 This indicates that growth dynamics differ considerably between different clades, even when  
329 leaf form is superficially similar<sup>67</sup>. While cell division and elongation are essential drivers of  
330 growth and development, the development of plant form can only be understood by studying  
331 the balance between these two processes, and their regulation in an organ-level and  
332 organismal context<sup>62,68–70</sup>.

333 A second connection between cell shape and organ form that has been proposed is that the  
334 highly undulating cells characteristic of some eudicots are a consequence of cell expansion in  
335 all directions in the plane of the leaf lamina<sup>19,58,71</sup>. In this case, one would expect highly  
336 anisotropic leaves to have cells with high solidity values; or that highly anisotropic cells would  
337 have high solidity values (fewer undulations). We detected no correlations between cell solidity  
338 and leaf aspect ratio, or between cell solidity and cell aspect ratio (Fig. S2). Thus, while margin  
339 undulation may not be related to organ shape in our broad sample, in non-eudicot species  
340 there is a correlation between low leaf aspect ratio and low cell aspect ratio. Further  
341 taxonomically broad exploration of cell expansion and division over time, similar to that applied  
342 in *arabidopsis*<sup>61,72,73</sup>, would prove highly informative for understanding the breadth of organ  
343 growth mechanisms present in the plant kingdom.

### 344 **Conclusions**

345 Our analysis has revealed striking diversity in leaf epidermal cell shape. This quantitative  
346 analysis has allowed for mapping of shape metrics in a phylogenetic context, demonstrating  
347 that while closely related eudicots tend to share cell shape characters, there is no obvious  
348 global trend of trait retention in this clade. The lack of consistent highly undulatory cell margins,  
349 like those observed in *arabidopsis*, make a strong case for expansion beyond a single model  
350 system. Similarly, while maize epidermal cells have highly undulate margins, monocots show



351 a phylogenetic signal for weakly undulating cells, again pointing to a need to work in species  
352 beyond the grasses.

353 How might epidermal shape diversity arise? Based on the well-resolved molecular network  
354 regulating cell shape in arabidopsis (and maize)<sup>2-4,6,9,74</sup>, an attractive hypothesis might be that  
355 the patterning system, centred on ROP-mediated exclusivity between actin and microtubule  
356 position, is variable among species. Variability in the patterning of cell wall synthesis and  
357 modification would yield variation in cell undulation. Alternatively, the cytoskeletal patterning  
358 mechanism might be perfectly consistent in most species (suggested by conservation  
359 between arabidopsis and maize), but cell wall synthesis and modification might differ between  
360 species and clades. Indeed, primary cell wall composition is highly variable across plants<sup>75</sup>.  
361 Looking to diversity in a quantitative phylogenetic framework will be critical in determining both  
362 how diverse cell shapes arise, and what their functions might be within organs and organisms.

363

364 **Acknowledgements.** The authors thank Joanna Wolstenholme, Jeffrey Heithmar, and  
365 Rebecca Goldberg, for preliminary work and technical assistance. We also thank the  
366 community attending FASEB Plant Development, a meeting at which this collaboration began.  
367 Tobias Baskin provided helpful comments on an earlier version of the manuscript. The  
368 University of Cambridge Botanic Garden and the UMass Natural History Collections are  
369 thanked for access to their collections, with special thanks to Sally Petit (CUBG), Christopher  
370 Phillips (UMass), Daniel Jones (UMass), and Alex Summers (CUBG). Work in the Braybrook  
371 group is supported by UCLA and previously was supported by The Gatsby Charitable  
372 Foundation (GAT3396/PR4) and R.V was supported by the EPSRC Cambridge NanoDTC  
373 (EP/G037221/1). Work in the Bartlett group is supported by the UMass Biology Department  
374 (G.D.P) and the NSF CAREER program (IOS-1652380).

375 **Author Contributions.** S.B. conceived of the original project and designed experiments with  
376 R.V. and M.B. M.B. and G.D.P. devised a sampling strategy. R.V and G.D.P collected  
377 samples, prepared and imaged samples, generated outlines, and utilised momocs for  
378 analyses. R.V, J.G., and M.B. performed in depth analyses with momocs, generated PCAs,  
379 and examined correlations between descriptors. M.B. performed phylogenetic signal  
380 analyses. S.B. and M.B wrote the manuscript and prepared figures, with assistance from R.V.  
381 and J.G.

1. Panteris, E., Apostolakos, P. & Galatis, B. Sinuous ordinary epidermal cells: behind several patterns of waviness, a common morphogenetic mechanism. *New Phytol.* **127**, 771–780 (1994).
2. Szymanski, D. B. Plant cells taking shape: new insights into cytoplasmic control. *Curr. Opin. Plant Biol.* **12**, 735–744 (2009).
3. Yang, Z. & Fu, Y. ROP/RAC GTPase signaling. *Curr. Opin. Plant Biol.* **10**, 490–494 (2007).
4. Panteris, E. & Galatis, B. The morphogenesis of lobed plant cells in the mesophyll and epidermis: organization and distinct roles of cortical microtubules and actin filaments. *New Phytol.* **167**, 721–732 (2005).
5. Mathur, J. Cell shape development in plants. *Trends Plant Sci.* **9**, 583–590 (2004).
6. Smith, L. G. Cytoskeletal control of plant cell shape: getting the fine points. *Curr. Opin. Plant Biol.* **6**, 63–73 (2003).
7. Jacques, E., Verbelen, J.-P. & Vissenberg, K. Review on shape formation in epidermal pavement cells of the Arabidopsis leaf. *Funct. Plant Biol.* **41**, 914 (2014).
8. Ivakov, A. & Persson, S. Plant cell shape: modulators and measurements. *Front. Plant Sci.* **4**, 439 (2013).
9. Qian, P., Hou, S. & Guo, G. Molecular mechanisms controlling pavement cell shape in Arabidopsis leaves. *Plant Cell Rep.* **28**, 1147–1157 (2009).
10. Hooke, R. *Micrographia: or, Some physiological descriptions of minute bodies made by magnifying glasses.* (J. Martyn and J. Allestry, 1665).
11. Esau, K. *Anatomy of Seed Plants.* (Wiley, 1977).
12. Belteton, S. A., Sawchuk, M. G., Donohoe, B. S., Scarpella, E. & Szymanski, D. B. Reassessing the Roles of PIN Proteins and Anticlinal Microtubules during Pavement Cell Morphogenesis. *Plant Physiol.* **176**, 432–449 (2018).
13. Fu, Y., Gu, Y., Zheng, Z., Wasteneys, G. & Yang, Z. Arabidopsis Interdigitating Cell Growth Requires Two Antagonistic Pathways with Opposing Action on Cell Morphogenesis. *Cell* **120**, 687–700 (2005).
14. Kotzer, A. M. & Wasteneys, G. O. Mechanisms behind the puzzle: microtubule–microfilament cross-talk in pavement cell formation This review is one of a selection of papers published in the Special Issue on Plant Cell Biology. <http://dx.doi.org/10.1139/b06-023> (2006). doi:10.1139/B06-023
15. Zhou, W. *et al.* Homologs of SCAR/WAVE complex components are required for epidermal cell morphogenesis in rice. *J. Exp. Bot.* **67**, 4311–23 (2016).
16. Linsbauer, K. in *Handbuch der Pflanzenanatomie* 1–263 (1930).
17. Galletti, R. & Ingram, G. C. Communication is key: Reducing DEK1 activity reveals a link between cell-cell contacts and epidermal cell differentiation status. *Commun. Integr. Biol.* **8**, e1059979 (2015).
18. Sotiriou, P., Giannoutsou, E., Panteris, E., Galatis, B. & Apostolakos, P. Local differentiation of cell wall matrix polysaccharides in sinuous pavement cells: its possible involvement in the flexibility of cell shape. *Plant Biol.* **20**, 223–237 (2018).
19. Sapala, A. *et al.* Why plants make puzzle cells, and how their shape emerges. *Elife* **7**, e32794 (2018).
20. Felsenstein, J. Phylogenies and the Comparative Method. *Am. Nat.* **125**, 1–15 (1985).
21. Kimball, S. & Mattis, P. GNU Image Manipulation Program. (1996).
22. Mathworks Inc. MATLAB and Statistical Toolbox.
23. Bonhomme, V., Picq, S., Gaucherel, C. & Claude, J. **Momocs** : Outline Analysis Using R. *J. Stat. Softw.* **56**, 1–24 (2014).
24. Zanne, A. E. *et al.* Three keys to the radiation of angiosperms into freezing environments. *Nature* **506**, 89–92 (2014).
25. Webb, C. O. & Donoghue, Mi. J. Phylomatic: tree assembly for applied phylogenetics. *Mol. Ecol. Notes* **5**, 181–183 (2005).
26. Slik, J. W. F. *et al.* Phylogenetic classification of the world’s tropical forests. *Proc. Natl. Acad. Sci. U. S. A.* **115**, 1837–1842 (2018).
27. Stamatakis, A. RAxML version 8: a tool for phylogenetic analysis and post-analysis of large phylogenies. *Bioinformatics* **30**, 1312–1313 (2014).
28. Miller, M. A., Pfeiffer, W. & Schwartz, T. Creating the CIPRES Science Gateway for inference of large phylogenetic trees. in *2010 Gateway Computing Environments Workshop (GCE)* 1–8 (IEEE, 2010). doi:10.1109/GCE.2010.5676129
29. Keck, F., Rimet, F., Bouchez, A. & Franc, A. phylosignal: an R package to measure, test, and explore the phylogenetic signal. *Ecol. Evol.* **6**, 2774–80 (2016).

30. Münkemüller, T. *et al.* How to measure and test phylogenetic signal. *Methods Ecol. Evol.* **3**, 743–756 (2012).
31. Yu, G., Smith, D. K., Zhu, H., Guan, Y. & Lam, T. T.-Y. ggtree : an r package for visualization and annotation of phylogenetic trees with their covariates and other associated data. *Methods Ecol. Evol.* **8**, 28–36 (2017).
32. Chase, M. W. *et al.* An update of the Angiosperm Phylogeny Group classification for the orders and families of flowering plants: APG IV. *Bot. J. Linn. Soc.* **181**, 1–20 (2016).
33. A community-derived classification for extant lycophytes and ferns. *J. Syst. Evol.* **54**, 563–603 (2016).
34. Wu, T.-C., Belteton, S. A., Pack, J., Szymanski, D. B. & Umulis, D. M. LobeFinder: A Convex Hull-Based Method for Quantitative Boundary Analyses of Lobed Plant Cells. *Plant Physiol.* **171**, (2016).
35. Sánchez-Corrales, Y. E., Hartley, M., van Rooij, J., Marée, A. F. M. & Grieneisen, V. A. Morphometrics of complex cell shapes: lobe contribution elliptic Fourier analysis (LOCO-EFA). *Development* **145**, dev156778 (2018).
36. Majda, M. *et al.* Mechanochemical Polarization of Contiguous Cell Walls Shapes Plant Pavement Cells. *Dev. Cell* **43**, 290–304.e4 (2017).
37. Dunn, R. E., Stromberg, C. A. E., Madden, R. H., Kohn, M. J. & Carlini, A. A. Linked canopy, climate, and faunal change in the Cenozoic of Patagonia. *Science (80-. )*. **347**, 258–261 (2015).
38. Kürschner, W. M. The anatomical diversity of recent and fossil leaves of the durmast oak (*Quercus petraea* Lieblein/*Q. pseudocastanea* Goeppert) — implications for their use as biosensors of palaeoatmospheric CO<sub>2</sub> levels. *Rev. Palaeobot. Palynol.* **96**, 1–30 (1997).
39. Tomescu, A. M. F. Megaphylls, microphylls and the evolution of leaf development. *Trends Plant Sci.* **14**, 5–12 (2009).
40. Ruhfel, B. R., Gitzendanner, M. A., Soltis, P. S., Soltis, D. E. & Burleigh, J. From algae to angiosperms—inferring the phylogeny of green plants (Viridiplantae) from 360 plastid genomes. *BMC Evol. Biol.* **14**, 23 (2014).
41. Korn, R. W. Concerning the Sinuous Shape of Leaf Epidermal Cells. *New Phytol.* **77**, 153–161 (1976).
42. Stoddard, E. M. Identifying plants by leaf epidermal characters. (1695).
43. Watson, R. W. the Effect of Cuticular Hardening on the Form of Epidermal Cells. *New Phytol.* **41**, 223–229 (1942).
44. Greguss, R. The Leaf-Epidermis of the Cycadales. *Acta Biol.(Szeged)* 151–164 (1957).
45. Ellis, R. P. A procedure for standardizing comparative leaf anatomy in the Poaceae. I. The leaf-blade as viewed in transverse section. *Bothalia* **12**, 65–109 (1976).
46. Kamilar, J. M. & Cooper, N. Phylogenetic signal in primate behaviour, ecology and life history. *Philos. Trans. R. Soc. Lond. B. Biol. Sci.* **368**, 20120341 (2013).
47. Davila, P. & Clark, L. G. Scanning Electron Microscopy Survey of Leaf Epidermis of Sorghastrum ( Poaceae : Andropogoneae ). *Am. J. Bot.* **77**, 499–511 (1990).
48. Barone Lumaga, M. R., Coiro, M., Truernit, E., Erdei, B. & De Luca, P. Epidermal micromorphology in *Dioon*: did volcanism constrain *Dioon* evolution? *Bot. J. Linn. Soc.* **179**, 236–254 (2015).
49. Jooste, M., Dreyer, L. L. & Oberlander, K. C. The phylogenetic significance of leaf anatomical traits of southern African Oxalis. *BMC Evol. Biol.* **16**, 225 (2016).
50. Augustine, S. M., Cherian, A. V., Syamaladevi, D. P. & Subramonian, N. *Erianthus arundinaceus* HSP70 ( *EaHSP70* ) Acts as a Key Regulator in the Formation of Anisotropic Interdigitation in Sugarcane ( *Saccharum* spp. hybrid) in Response to Drought Stress. *Plant Cell Physiol.* **56**, 2368–2380 (2015).
51. Bone, R. A., Lee, D. W. & Norman, J. M. Epidermal cells functioning as lenses in leaves of tropical rain-forest shade plants. *Appl. Opt.* **24**, 1408 (1985).
52. Poulson, M. E. & Vogelmann, T. C. Epidermal focussing and effects upon photosynthetic light-harvesting in leaves of Oxalis. *Plant, Cell Environ.* **13**, 803–811 (1990).
53. AROGUNDADE, O. O. & ADEDEJI, O. Comparative Foliar and Petiole Anatomy of Some Members of the Genus Dieffenbachia Schott in the Family Araceae. *Not. Sci. Biol.* **9**, 94–103 (2017).
54. Askenasy, E. Über den Einfluss des Wachstumsmediums auf die Gestalt der Pflanzen. *Bot. Zeit.* **28**, (1870).
55. Brenner, W. Untersuchungen an einigen Fettpflanzen. *Flora* **87**, 387 (1900).
56. Anheisser, R. Über die aruncoide Blattspreite. *Flora* **87**, (1900).

57. Ambronn, H. Über Poren in den Aussenwänden von Epidermiszellen. *Jb. wiss. Bot.* **14**, (1884).
58. Avery, G. S. Structure and Development of the Tobacco Leaf. *Am. J. Bot.* **20**, 565 (1933).
59. Driscoll, S. P., Prins, A., Olmos, E., Kunert, K. J. & Foyer, C. H. Specification of adaxial and abaxial stomata, epidermal structure and photosynthesis to CO<sub>2</sub> enrichment in maize leaves. *J. Exp. Bot.* **57**, 381–390 (2006).
60. Pulungan, S. I. *et al.* SILAX1 is Required for Normal Leaf Development Mediated by Balanced Adaxial and Abaxial Pavement Cell Growth in Tomato. *Plant Cell Physiol.* (2018). doi:10.1093/pcp/pcy052
61. Elsner, J., Michalski, M. & Kwiatkowska, D. Spatiotemporal variation of leaf epidermal cell growth: a quantitative analysis of *Arabidopsis thaliana* wild-type and triple cyclinD3 mutant plants. *Ann. Bot.* **109**, 897–910 (2012).
62. Kaplan, D. R. & Hagemann, W. The Relationship of Cell and Organism in Vascular Plants. *Bioscience* **41**, 693–703 (1991).
63. Vlad, D. *et al.* Leaf Shape Evolution Through Duplication, Regulatory Diversification, and Loss of a Homeobox Gene. *Science* (80-. ). **343**, (2014).
64. Landis, J. B. *et al.* The Phenotypic and Genetic Underpinnings of Flower Size in Polemoniaceae. *Front. Plant Sci.* **6**, 1144 (2015).
65. Landis, J. B., Ventura, K. L., Soltis, D. E., Soltis, P. S. & Oppenheimer, D. G. Optical Sectioning and 3D Reconstructions as an Alternative to Scanning Electron Microscopy for Analysis of Cell Shape. *Appl. Plant Sci.* **3**, 1400112 (2015).
66. Ding, B. *et al.* A dominant-negative actin mutation alters corolla tube width and pollinator visitation in *Mimulus lewisii*. *New Phytol.* **213**, 1936–1944 (2017).
67. Gázquez, A. & Beemster, G. T. S. What determines organ size differences between species? A meta-analysis of the cellular basis. *New Phytol.* **215**, 299–308 (2017).
68. Ranjan, A., Townsley, B. T., Ichihashi, Y., Sinha, N. R. & Chitwood, D. H. An Intracellular Transcriptomic Atlas of the Giant Coenocyte *Caulerpa taxifolia*. *PLoS Genet.* **11**, e1004900 (2015).
69. Martinez, P., Luo, A., Sylvester, A. & Rasmussen, C. G. Proper division plane orientation and mitotic progression together allow normal growth of maize. *Proc. Natl. Acad. Sci. U. S. A.* **114**, 2759–2764 (2017).
70. Sablowski, R. Coordination of plant cell growth and division: collective control or mutual agreement? *Curr. Opin. Plant Biol.* **34**, 54–60 (2016).
71. Glover, B. J. Differentiation in plant epidermal cells. *J. Exp. Bot.* **51**, 497–505 (2000).
72. Andriankaja, M. *et al.* Exit from Proliferation during Leaf Development in *Arabidopsis thaliana*: A Not-So-Gradual Process. *Dev. Cell* **22**, 64–78 (2012).
73. Rolland-Lagan, A.-G., Remmler, L. & Girard-Bock, C. Quantifying Shape Changes and Tissue Deformation in Leaf Development. *Plant Physiol.* **165**, 496–505 (2014).
74. Mathur, J. The ARP2/3 complex: giving plant cells a leading edge. *BioEssays* **27**, 377–387 (2005).
75. Popper, Z. A. Evolution and diversity of green plant cell walls. *Curr. Opin. Plant Biol.* **11**, 286–292 (2008).



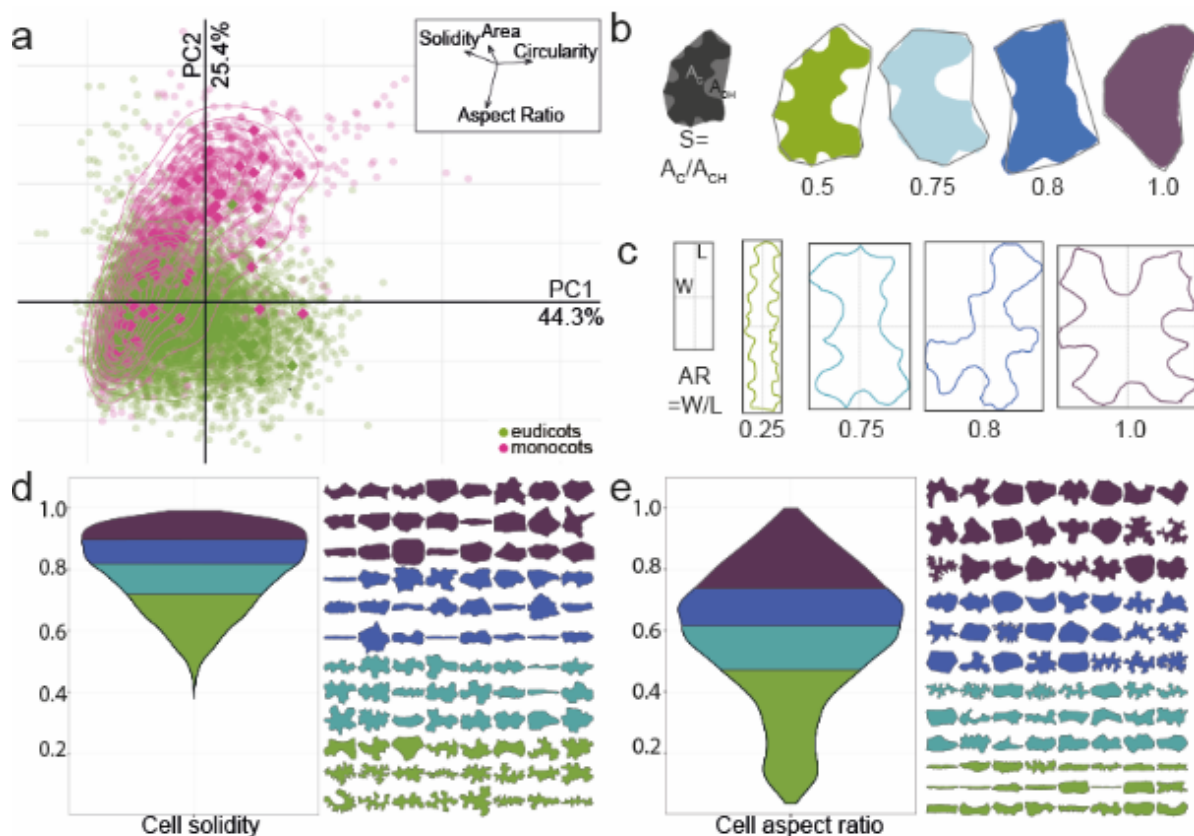

**Figure 1. Traditional shape descriptors describe variation in base cell shape and margin undulation.** (a) A Principal Component Analysis of all epidermal cells sampled from monocots (pink) and eudicots (green) using traditional shape descriptors of aspect ratio (AR), area (A), circularity (C), and solidity (S). In this analysis, 69.7% of shape variance in the data set was explained by the first two principal components. The vectors describing the morphospace (inset) demonstrate how each shape descriptor relates to the first two components. (b) An illustration of cell solidity (S) calculation as the ratio of cell area to the convex hull area and its results from four representative cells with constant aspect ratio; colouring of representative cells matches quartiles below in d. (c) An illustration of aspect ratio (AR) calculation as the ratio of maximal width to maximal length and its results from four representative cells with constant solidity value; colouring of representative cells matches quartiles below in e. (d) The distribution of solidity values for our entire data set, coloured according to quartiles. 24 cells from the median of each quartile are displayed with the same colour coding for reference. (e) The distribution of aspect ratio values for our entire data set coloured according to quartiles. 24 cells from the median of each quartile are displayed with the same colour coding for reference.

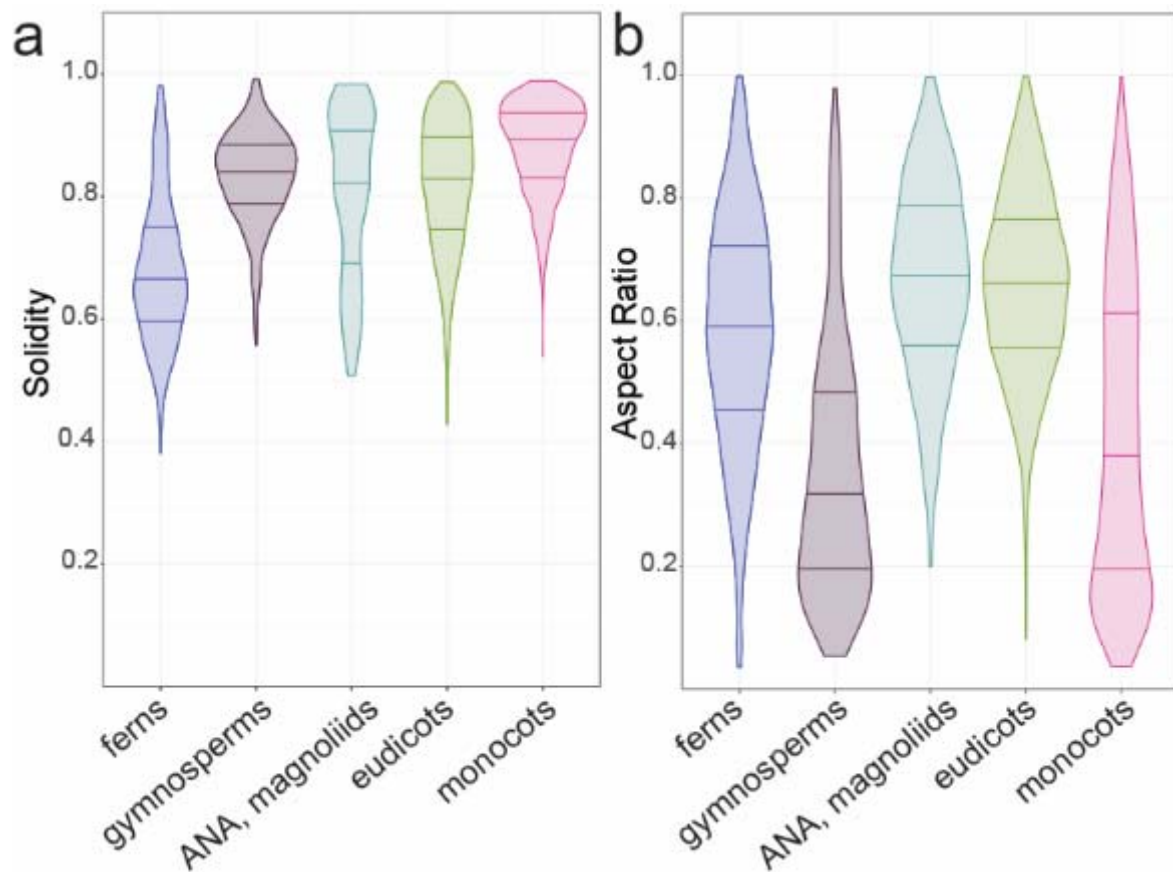

**Figure 2. Solidity and aspect ratio distributions vary between clades.** (a) Solidity and (b) aspect ratio data are presented as distributions by clade for ferns, gymnosperms, the ANA grade and magnoliids, monocots, and eudicots. Note that the mean solidity values for both arabidopsis ( $S_{At}=0.67$ ) and maize ( $S_{Zm}=0.63$ ) fall within the tails of the eudicot and monocot distributions, respectively. No sample size scaling has been applied.

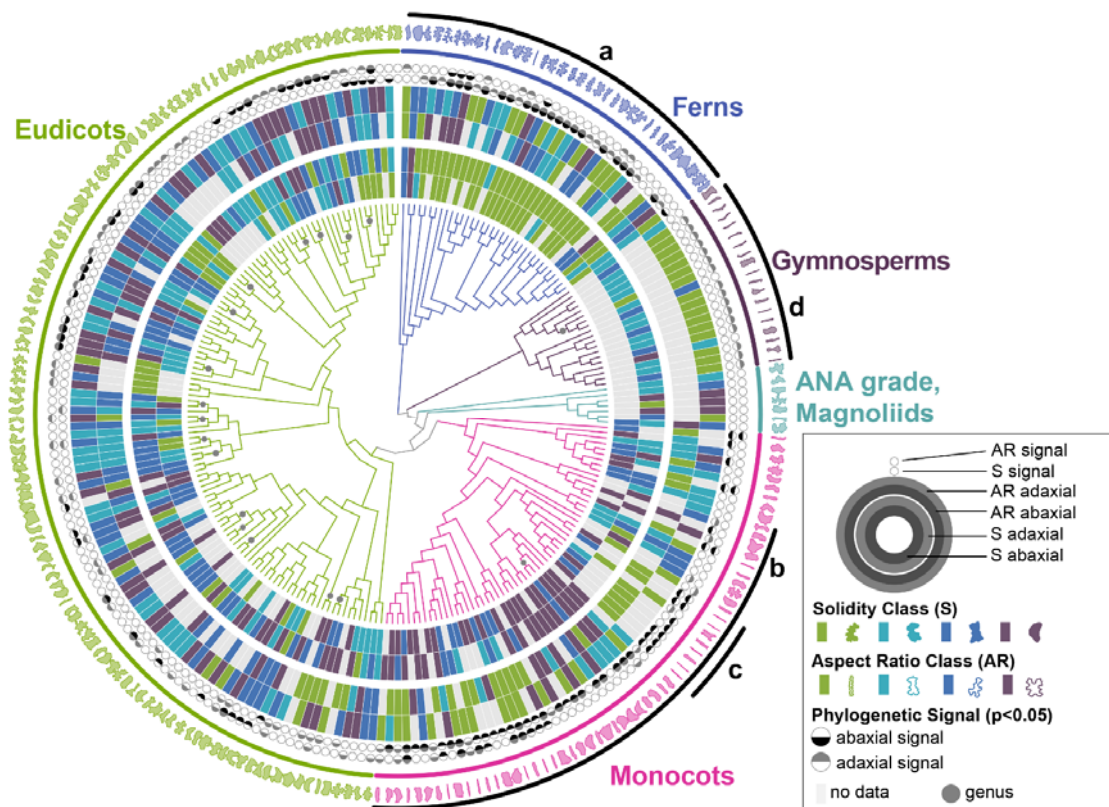

**Figure 3. Pavement cells in the ferns, gymnosperms, and monocots are characterized by particular shape metrics, while eudicots exhibit wide variation.** A phylogenetic reconstruction of taxa sampled in our dataset (centre) surrounded by data rings depicting cell aspect ratio and solidity, and leaf aspect ratio (see legend for positional key). Branch lengths are not shown in this figure, although they were used in all analyses. Taxonomic groups are indicated by colour. One representative cell shape from each species is depicted on the outermost ring. Specific clades are indicated as follows: (a) ferns; (b) the core monocots; (c) the grasses; (d) gymnosperms. Each grey dot on tree indicates multiple species in the same genus. All data and species names can be found in Table S1.

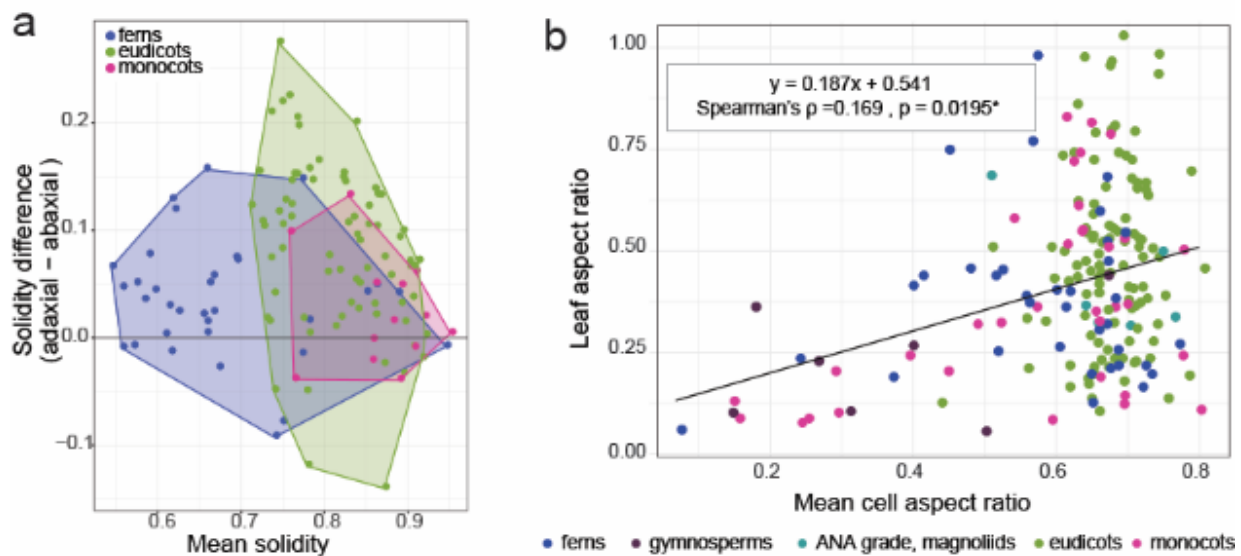

**Figure 4. Cell metrics vary according to particular leaf traits.** (a) Cell solidity is often lower (higher undulation) on the abaxial leaf face. (b) In the full data set, regardless of leaf side, mean cell aspect ratio and mean leaf aspect ratio are correlated. Anisotropic leaves tend to have anisotropic cells, but not in the eudicots. Linear regression line, based on all data, is shown with Spearman's ( $\rho$ ) correlation coefficient. All data can be found in Table S1.



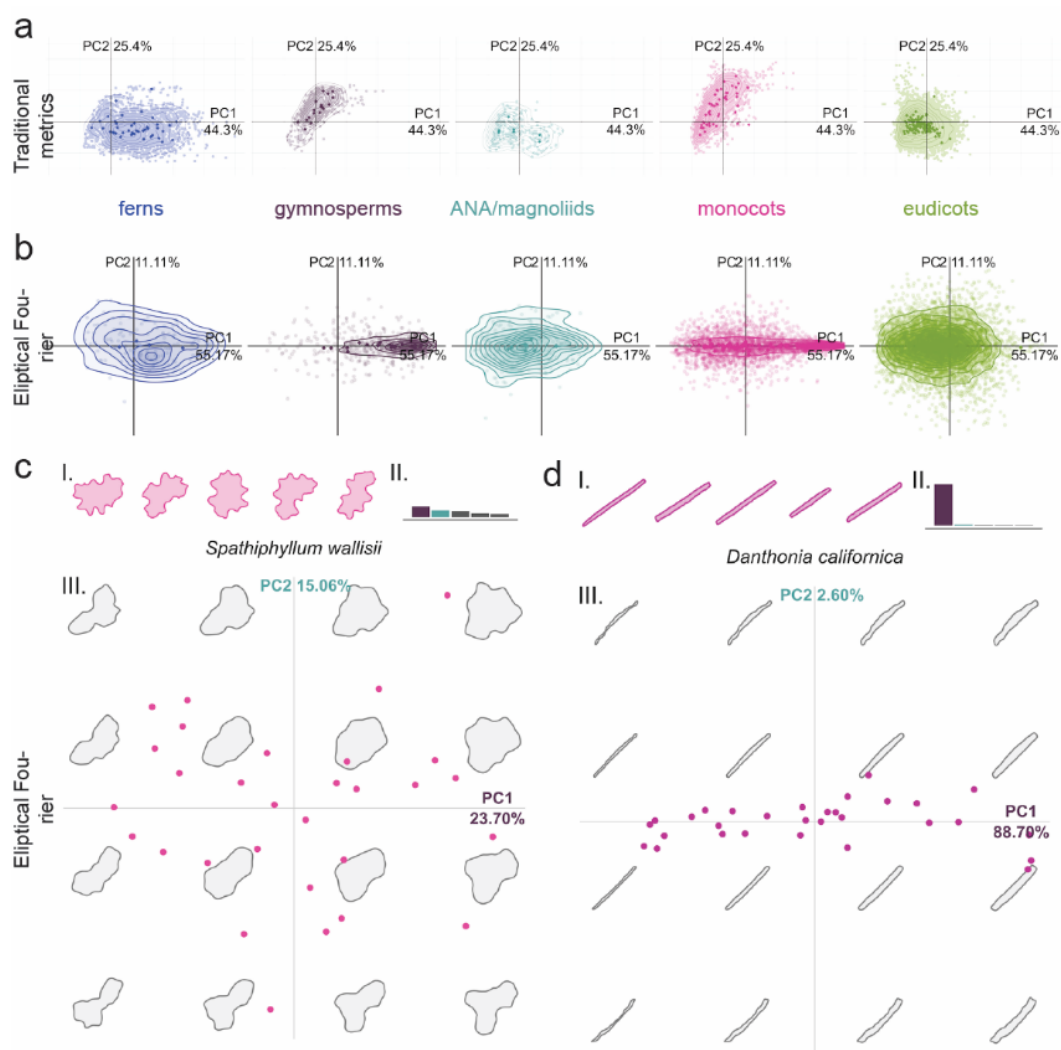

**Figure S1. Results from Traditional and Elliptical Fourier analysis of cell shapes.** Morphospace for PCA1 and PCA2 (a) Traditional; (b) Elliptical Fourier, split by clade. The analysis was performed on all groups together but shown here independently. Fourier analysis morphospaces for two monocot examples (c) *Danthonia californica* and (d) *Spathiphyllum wallisii*, exhibiting margin undulation and cell anisotropy, respectively. Representative cells shapes (I), eigenvalues for PCA1 (purple) and PCA2 (turquoise) (II), and PCA1 and PCA2 morphospaces (III); this analyses demonstrates the utility of Elliptical Fourier analysis for cell base shape (anisotropy in *Danthonia* is well described by 88.7% in PCA1) and its lacking when margin undulation is the variable trait (*Spathiphyllum*, low percentage of variation explained by any one PCA as show in eigen values).

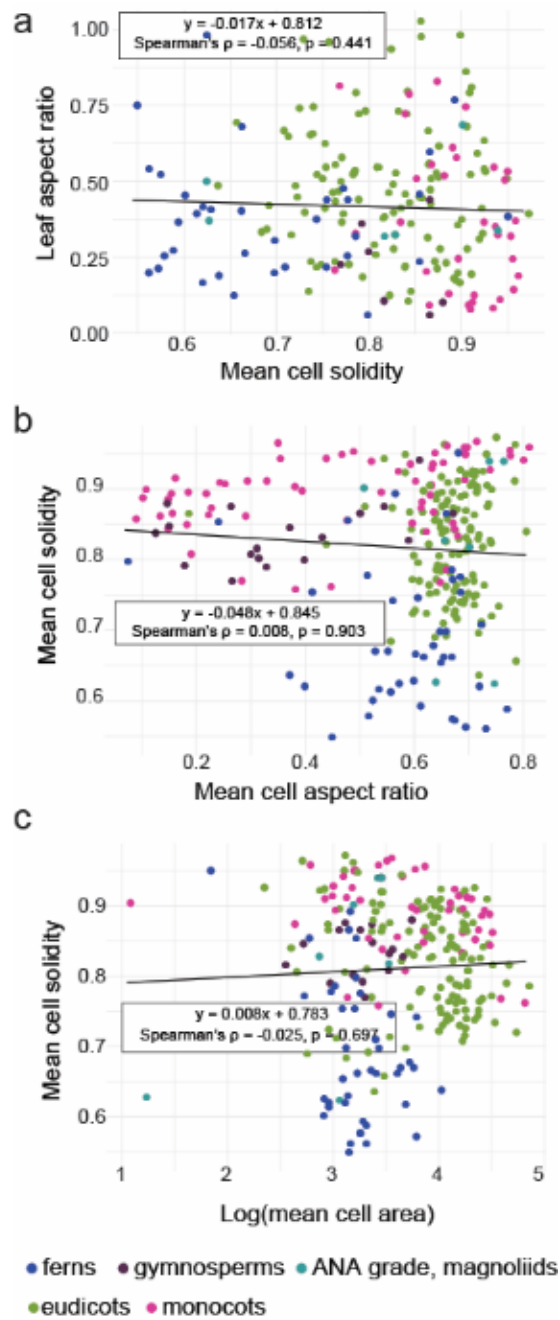

**Figure S2. Correlation plots for cell and leaf metrics.** No correlation was evident between (a) mean cell solidity and leaf aspect ratio; (b) mean cell aspect ratio and mean cell solidity; (c) log(mean cell area) and mean cell solidity.

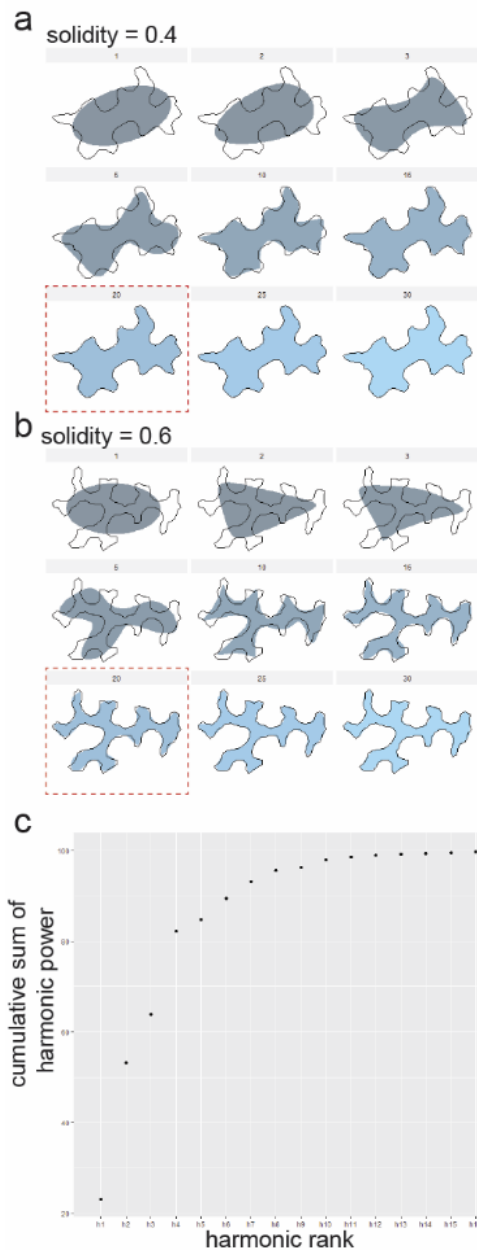

**Figure S3. Harmonic assessment for Elliptical Fourier Analysis.** Representative cell shapes of solidity values 0.6 (a) and 0.4 (b) with fitted ellipses at several harmonic ranks. While the less undulatory cell ( $S=0.6$ ) could be fit with 15 harmonics, the more undulatory ( $S=0.4$ ) cell is best fit by 20 harmonics. For this reason, 20 harmonics were chosen for our analyses. (c) a graph of the cumulative sum harmonic power for our dataset (a measure of how many harmonics are required to fit the data) and 99.9% is easily reached with h16.
